# Supplementary material
Source: PubMed Central journal article supplement (PMC3874809)
Supplement: NIHMS341990-supplement-12.pdf [file NIHMS341990-supplement-12.pdf]

Supplementary Table 5: Predicted Strong Affinity Epitopes Specific for d42m1 Regressor Tumours

H-2D<sup>b</sup>:

|                 | Peptides              |  | IC <sub>50</sub> (nM) | P | T1 | T2 | T9 |
|-----------------|-----------------------|--|-----------------------|---|----|----|----|
| Olf195 (L14M)   | YSVTNEFIL (wild-type) |  | 5                     | ● |    |    |    |
|                 | YSVTNEFIM (mutant)    |  | 5                     |   |    |    |    |
| Spnb2 (R913L)   | VAVVNQIAR (wild-type) |  | 5305                  | ● | ●  | ●  | ●  |
|                 | VAVVNQIAL (mutant)    |  | 7                     |   |    |    |    |
| Tbk1 (G722S)    | GGLRNVDCL (wild-type) |  | 36                    |   |    |    | ●  |
|                 | GSLRNVDCL (mutant)    |  | 8                     |   |    |    |    |
| Fam38a (M134I)  | MAGINTDHL (wild-type) |  | 23                    | ● | ●  | ●  | ●  |
|                 | IAGINTDHL (mutant)    |  | 14                    |   |    |    |    |
| Cxx1b (D54N)    | YMLVDDRTF (wild-type) |  | 4303                  |   | ●  | ●  |    |
|                 | YMLVNDRTF (mutant)    |  | 14                    |   |    |    |    |
| H2-Q6 (R142L)   | FAYEGRDYI (wild-type) |  | 27                    | ● | ●  | ●  | ●  |
|                 | FAYEGLDYI (mutant)    |  | 14                    |   |    |    |    |
| A2m (G777V)     | FCLSNDTGL (wild-type) |  | 502                   | ● | ●  | ●  | ●  |
|                 | FCLSNDTVL (mutant)    |  | 15                    |   |    |    |    |
| Ubqln4 (R262L)  | RALSNLESV (wild-type) |  | 10                    | ● | ●  | ●  |    |
|                 | LALSNLESV (mutant)    |  | 24                    |   |    |    |    |
| Olf1715 (D159N) | VSVVDTTFT (wild-type) |  | 11905                 | ● | ●  | ●  | ●  |
|                 | VSVVNTTFT (mutant)    |  | 41                    |   |    |    |    |
| Dst (W4459L)    | AMMQWLEKM (wild-type) |  | 108                   | ● | ●  | ●  |    |
|                 | AMMQLEKM (mutant)     |  | 45                    |   |    |    |    |
| Tcl1 (H146N)    | AAPSHAAVA (wild-type) |  | 15262                 | ● |    |    | ●  |
|                 | AAPSNAAVA (mutant)    |  | 48                    |   |    |    |    |

H-2K<sup>b</sup>:

|                 | Peptides             |  | IC <sub>50</sub> (nM) | P | T1 | T2 | T9 |
|-----------------|----------------------|--|-----------------------|---|----|----|----|
| Gm10577 (W61R)  | VTFQYSWV (wild-type) |  | 6                     | ● | ●  | ●  | ●  |
|                 | VTFQYSRV (mutant)    |  | 2                     |   |    |    |    |
| Wscd1 (A183G)   | RSYVYAGL (wild-type) |  | 2                     | ● | ●  | ●  | ●  |
|                 | RSYVYGGL (mutant)    |  | 3                     |   |    |    |    |
| Zdhhc22 (C137Y) | LACLYSMV (wild-type) |  | 683                   | ● | ●  | ●  | ●  |
|                 | LAYLYSMV (mutant)    |  | 5                     |   |    |    |    |
| Nckap1 (R917P)  | VILSFRSL (wild-type) |  | 4                     | ● | ●  | ●  | ●  |
|                 | VILSFPSL (mutant)    |  | 5                     |   |    |    |    |

H-2K<sup>b</sup> (continued):

|                   | Peptides                    |  | IC <sub>50</sub> (nM) | P | T1 | T2 | T9 |
|-------------------|-----------------------------|--|-----------------------|---|----|----|----|
| Olfr1394 (T284N)  | VTPMFNPL (wild-type)        |  | 6                     | ● | ●  | ●  | ●  |
|                   | V <u>N</u> TPMFNPL (mutant) |  | 5                     |   |    |    |    |
| Epb4.1I4b (H159L) | VGPAYALH (wild-type)        |  | 3972                  | ● | ●  | ●  | ●  |
|                   | VGPAYALL (mutant)           |  | 6                     |   |    |    |    |
| Vipr2 (F298L)     | IVVNFALF (wild-type)        |  | 169                   | ● | ●  | ●  | ●  |
|                   | IVVNFALL (mutant)           |  | 7                     |   |    |    |    |
| Abca14 (A454G)    | SAFLYGLV (wild-type)        |  | 8                     | ● | ●  | ●  | ●  |
|                   | S <u>G</u> FLYGLV (mutant)  |  | 7                     |   |    |    |    |
| Oog3 (L252M)      | VYFIYGNL (wild-type)        |  | 6                     |   |    |    | ●  |
|                   | VYFIY <u>G</u> NM (mutant)  |  | 7                     |   |    |    |    |
| Tmem194 (W245C)   | RSYWHYLL (wild-type)        |  | 9                     | ● | ●  | ●  | ●  |
|                   | RSY <u>C</u> HYLL (mutant)  |  | 8                     |   |    |    |    |
| Tas2r116 (K110N)  | SIFYFFKI (wild-type)        |  | 36                    | ● | ●  | ●  | ●  |
|                   | SIFYFF <u>N</u> I (mutant)  |  | 10                    |   |    |    |    |
| Cntnap3 (G382V)   | SSGSYLAL (wild-type)        |  | 97                    |   |    | ●  |    |
|                   | SS <u>V</u> SYLAL (mutant)  |  | 11                    |   |    |    |    |
| Mettl4-ps1 (P30L) | SGFLYPLV (wild-type)        |  | 7                     | ● | ●  | ●  | ●  |
|                   | SGFLY <u>L</u> LV (mutant)  |  | 13                    |   |    |    |    |
| Dnmt3a (R732P)    | LFFEFYRL (wild-type)        |  | 25                    |   |    |    | ●  |
|                   | LFFEFY <u>P</u> L (mutant)  |  | 14                    |   |    |    |    |
| Pde2a (S542N)     | ISIAHSLL (wild-type)        |  | 8                     | ● | ●  | ●  | ●  |
|                   | I <u>N</u> IAHSLL (mutant)  |  | 14                    |   |    |    |    |
| Got1l1 (L66M)     | LDYEYLPL (wild-type)        |  | 29                    |   |    |    | ●  |
|                   | <u>M</u> DYEYLPL (mutant)   |  | 14                    |   |    |    |    |
| Cyp3a41a (V302I)  | IVFIFAGY (wild-type)        |  | 26                    |   |    | ●  |    |
|                   | I <u>I</u> FIFAGY (mutant)  |  | 14                    |   |    |    |    |
| Gm16965 (E82Q)    | SSTAYMEL (wild-type)        |  | 37                    | ● | ●  | ●  | ●  |
|                   | SSTAYM <u>Q</u> L (mutant)  |  | 15                    |   |    |    |    |
| Cyb5r2 (A68T)     | VIRAYTPV (wild-type)        |  | 28                    | ● |    |    |    |
|                   | VIR <u>T</u> YTPV (mutant)  |  | 18                    |   |    |    |    |
| Atg9a (C519F)     | DTCSFAQM (wild-type)        |  | 1840                  | ● | ●  | ●  | ●  |
|                   | D <u>T</u> FSFAQM (mutant)  |  | 19                    |   |    |    |    |
| Nop56 (G194V)     | YGYHFPEL (wild-type)        |  | 22                    |   | ●  | ●  | ●  |
|                   | Y <u>V</u> YHFPEL (mutant)  |  | 20                    |   |    |    |    |
| Ogdh (V420I)      | IVYETFHL (wild-type)        |  | 35                    |   | ●  | ●  | ●  |
|                   | I <u>I</u> YETFHL (mutant)  |  | 22                    |   |    |    |    |

H-2K<sup>b</sup> (continued):

|               | Peptides                                 | IC <sub>50</sub> (nM) | P | T1 | T2 | T9 |
|---------------|------------------------------------------|-----------------------|---|----|----|----|
| Bco2M300I     | MYYSMPFL (wild-type)                     | 101                   | ● | ●  | ●  | ●  |
|               | <u>I</u> YYSMPFL (mutant)                | 24                    |   |    |    |    |
| Abcd4V196L    | SIFGYFIV (wild-type)                     | 70                    |   |    |    | ●  |
|               | SIFGYF <u>I</u> L (mutant)               | 26                    |   |    |    |    |
| Inpp5dM532L   | VSFMFNGT (wild-type)                     | 23                    | ● | ●  | ●  | ●  |
|               | VSF <u>L</u> FNGT (mutant)               | 28                    |   |    |    |    |
| Qsox2D654Y    | FSSLDMSL (wild-type)                     | 8608                  | ● | ●  | ●  | ●  |
|               | FSS <u>L</u> YMSL (mutant)               | 28                    |   |    |    |    |
| Odz2V569F     | VSFNTVVL (wild-type)                     | 84                    | ● | ●  | ●  | ●  |
|               | VSFNTV <u>F</u> L (mutant)               | 29                    |   |    |    |    |
| Adra1aG315V   | IVFWLGYL (wild-type)                     | 28                    | ● | ●  | ●  | ●  |
|               | IVFWL <u>Y</u> YL (mutant)               | 29                    |   |    |    |    |
| Tas2r113W206L | SLLI <sup>+</sup> FSLW (wild-type)       | 1743                  | ● | ●  | ●  | ●  |
|               | SLLI <sup>+</sup> FS <u>L</u> L (mutant) | 30                    |   |    |    |    |
| Prom1I61M     | MVHIFLNV (wild-type)                     | 47                    | ● | ●  | ●  | ●  |
|               | MVH <u>M</u> FLNV (mutant)               | 31                    |   |    |    |    |
| Rad9bP281L    | SSPQLLPL (wild-type)                     | 78                    |   |    |    | ●  |
|               | SS <u>L</u> QLLPL (mutant)               | 32                    |   |    |    |    |
| Psrc1R63L     | VRFSLGPL (wild-type)                     | 270                   | ● | ●  | ●  | ●  |
|               | V <u>L</u> FSLGPL (mutant)               | 33                    |   |    |    |    |
| StambpQ183P   | IVQEF <sup>+</sup> GKV (wild-type)       | 90                    | ● | ●  | ●  | ●  |
|               | IV <u>P</u> EF <sup>+</sup> GKV (mutant) | 34                    |   |    |    |    |
| Ryr2T1658N    | LQFHYHTL (wild-type)                     | 186                   | ● | ●  |    |    |
|               | LQFHYH <u>N</u> L (mutant)               | 34                    |   |    |    |    |
| Camk2bG201R   | GVILYILL (wild-type)                     | 219                   |   |    |    | ●  |
|               | <u>R</u> VILYILL (mutant)                | 36                    |   |    |    |    |
| Thsd1G148V    | GVFTTQPL (wild-type)                     | 2830                  |   | ●  | ●  | ●  |
|               | <u>V</u> VFTTQPL (mutant)                | 37                    |   |    |    |    |
| Olf1104G96C   | ISFVGCFV (wild-type)                     | 73                    | ● | ●  | ●  | ●  |
|               | ISFV <u>C</u> CFV (mutant)               | 40                    |   |    |    |    |
| Trpc7G654V    | VLYGVYNV (wild-type)                     | 186                   | ● | ●  | ●  | ●  |
|               | VLY <u>V</u> VYNV (mutant)               | 41                    |   |    |    |    |
| Cacng8G79V    | GGLTHSGL (wild-type)                     | 3390                  | ● | ●  | ●  |    |
|               | <u>V</u> GLTHSGL (mutant)                | 42                    |   |    |    |    |
| Grsf1S435C    | ITMEYSSS (wild-type)                     | 535                   | ● | ●  | ●  | ●  |
|               | ITMEY <u>S</u> C (mutant)                | 44                    |   |    |    |    |

H-2K<sup>b</sup> (continued):

|                  | Peptides                   | IC <sub>50</sub> (nM) | P | T1 | T2 | T9 |
|------------------|----------------------------|-----------------------|---|----|----|----|
| Dnahc17 (M1234I) | IMRDLANL (wild-type)       | 74                    |   | ●  | ●  |    |
|                  | I <u>I</u> RDLANL (mutant) | 47                    |   |    |    |    |
| Olfr1022 (D181V) | INHFYCAD (wild-type)       | 8258                  | ● |    |    |    |
|                  | INHFYCA <u>V</u> (mutant)  | 49                    |   |    |    |    |
| Olfr1366 (L68F)  | ANLSLVDL (wild-type)       | 1667                  |   | ●  |    |    |
|                  | ANLS <u>F</u> VDL (mutant) | 50                    |   |    |    |    |

**Supplemental Table 5. Predicted Strong Affinity Epitopes Specific for d42m1 Regressor Tumours.** A list of all epitopes that are predicted to bind with strong affinity (i.e. IC<sub>50</sub> < 50nM), resulting from mutations present in any regressor tumour samples, but not in any of the progressor tumour samples. The list order is based on the predicted affinity of the mutant epitope to either H-2D<sup>b</sup> or H-2K<sup>b</sup>, beginning with the strongest predicted binder. Spnb2 is the strongest H-2D<sup>b</sup> epitope present in all of the regressor samples. 'P' = parental d42m1; 'T1' = d42m1-T1 clone; 'T2' = d42m1-T2 clone; 'T9' = d42m1-T9 clone; 'Gm10577' corresponds to Ensembl gene product ENSMUSG00000073789; 'Gm16965' corresponds to ENSMUSG00000076702.
